# Supplementary material for: PDAUG: a Galaxy based toolset for peptide library analysis, visualization, and machine learning modeling
Source: PubMed Central journal article supplement (PMC9148462; doi:10.1186/s12859-022-04727-6), 2022-05-28
Supplement: 12859_2022_4727_MOESM1_ESM.pdf [file 12859_2022_4727_MOESM1_ESM.pdf]

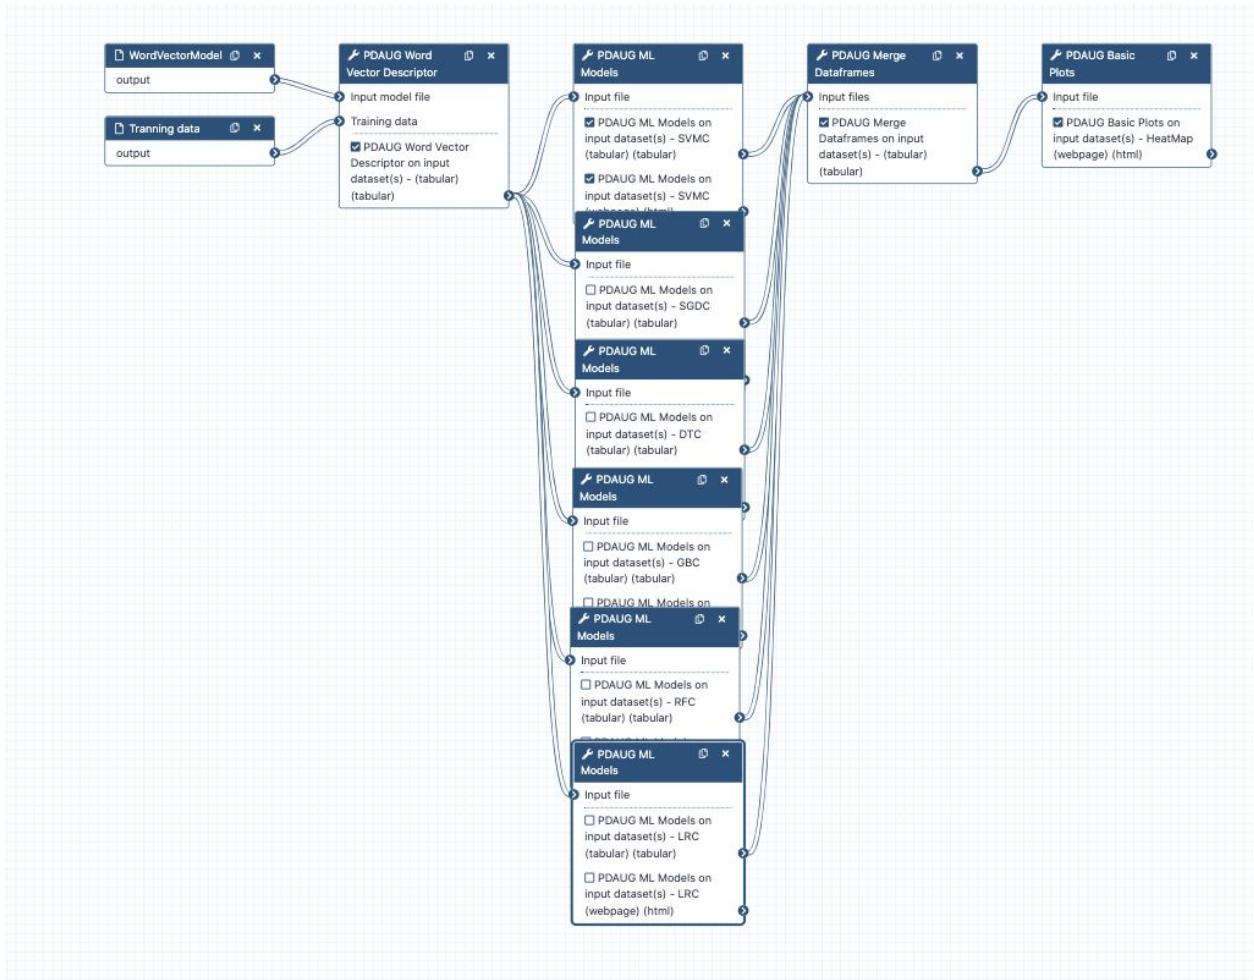

**Supplementary Figure 1.** Workflow to perform machine learning modeling based on word vector descriptors.

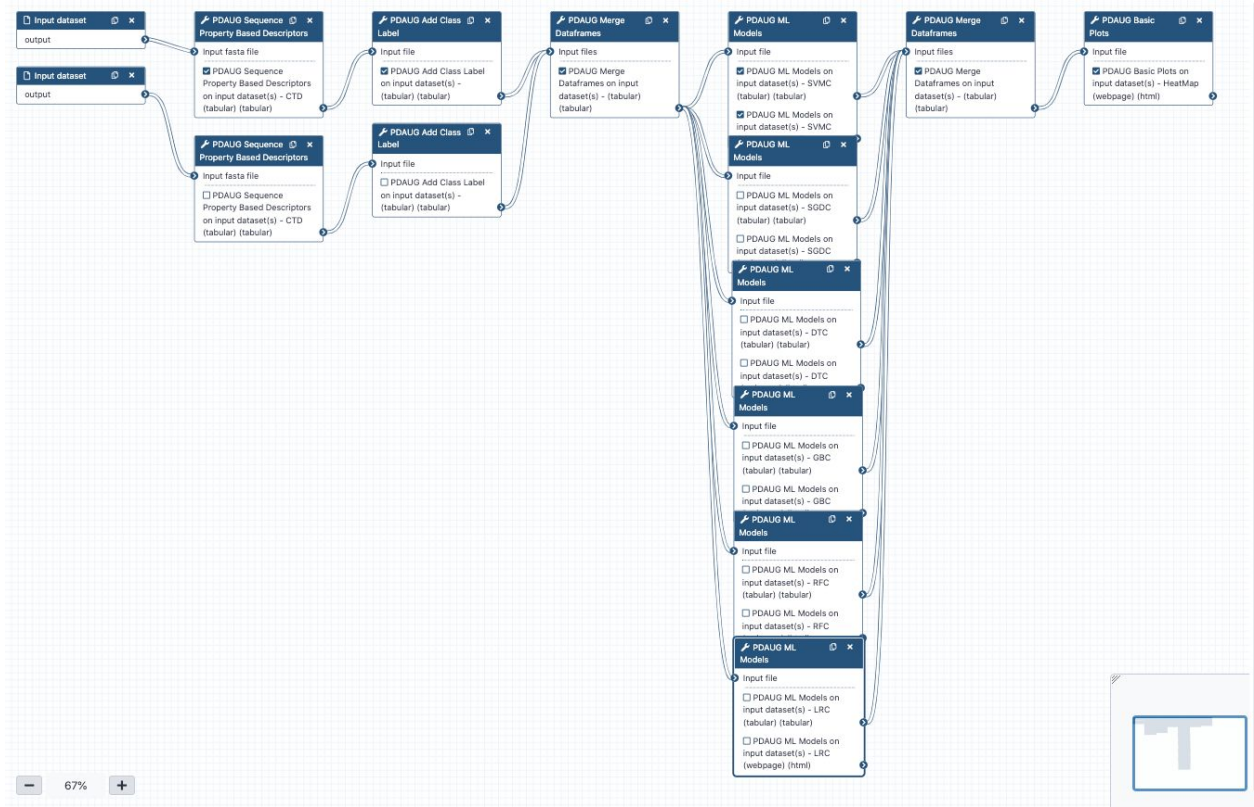

**Supplementary Figure 2.** Workflow to perform machine learning modeling based on CTD descriptors.

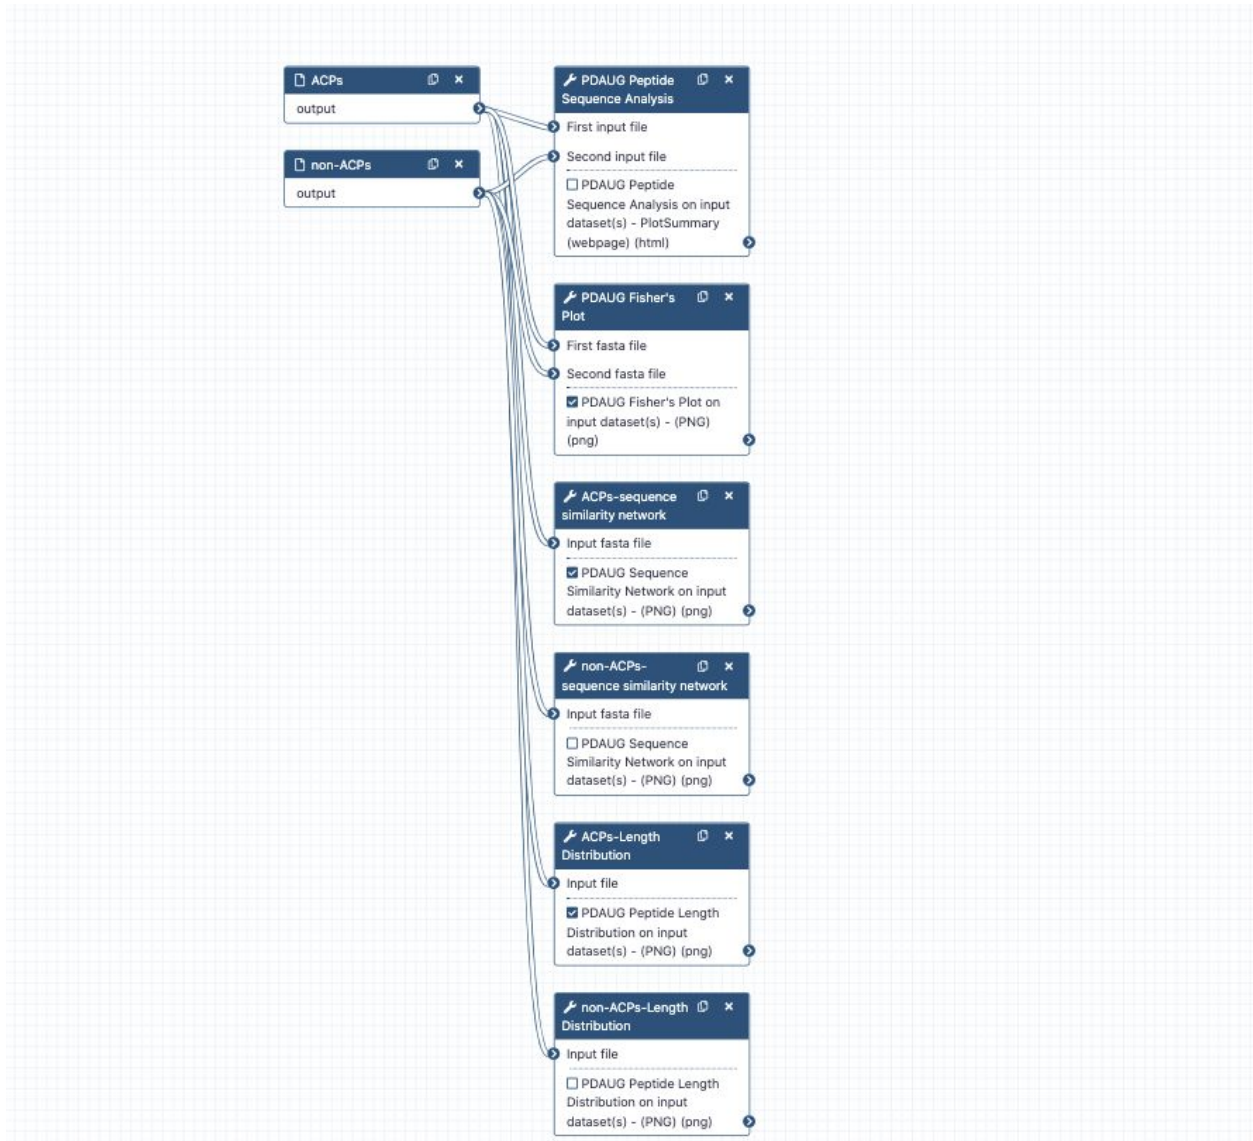

**Supplementary Figure 3.** Workflow to generate summary plot, Fisher's plot, sequence similarity network, and length distribution plot.
