# Supplementary material for: PDAUG: a Galaxy based toolset for peptide library analysis, visualization, and machine learning modeling
Source: PubMed Central journal article supplement (PMC9148462; doi:10.1186/s12859-022-04727-6), 2022-05-28
Supplement: 12859_2022_4727_MOESM11_ESM.pdf [file 12859_2022_4727_MOESM11_ESM.pdf]

**Supplementary Table 1.** Important mathematical equations have been included for the implemented descriptors.

| <b>Descriptor name</b> | <b>Formula</b>                                                                                                                                                                                                                                                |
|------------------------|---------------------------------------------------------------------------------------------------------------------------------------------------------------------------------------------------------------------------------------------------------------|
| Charge Density         | $CD = C/D$ , C = Charge, D = Density                                                                                                                                                                                                                          |
| Isoelectric point      | $pI = \frac{1}{2}(pK_{a1} + pK_{a2})$                                                                                                                                                                                                                         |
| Instabiliity Index     | $II = \frac{10}{L} \times \sum DIWV(x[i] \times [i + 1])$ <p>DIWV-Di-peptide weight value<br/>L length of sequence.<br/>I Position</p>                                                                                                                        |
| GetAAComp              | $f(t) = \frac{N(t)}{N}, \quad t \in \{A, C, D, \dots Y\}$ <p>N is number of Amino Acids, t is type A, C, D, ... Y</p>                                                                                                                                         |
| GetDPComp              | $D(r, s) = \frac{Nrs}{N - 1}, \quad r, s \in \{A, C, D, \dots Y\}$ <p>Nrs is dipeptides represented by amino acid types r and s.</p>                                                                                                                          |
| GetTPComp              | $D(r, s, t) = \frac{Nrst}{N - 2}, \quad r, s, t \in \{A, C, D, \dots Y\}$ <p>Nrst tripeptides represented by amino acid types r, s and t.</p>                                                                                                                 |
| GetMoranAuto           | $AC(d) = \sum_{i=1}^{N-d} P_i \times P_{i+d}, \quad d = 1, 2, \dots, nlag$ <p>d is the lag of the autocorrelation,<br/>nlag is the maximum value of the lag<br/>Pi and Pi+d are the properties of the amino acids at positions i and i + d, respectively.</p> |
| GetMoreauBrotoAuto     | $ATS(d) = \frac{AC(d)}{N - d}, \quad d = 1, 2, \dots, nlag$ <p>D N and nlag have the same definitions as described above</p>                                                                                                                                  |
| GetGearAuto            | $C(d) = \frac{\frac{1}{2(N-d)} \sum_{i=1}^{N-d} (P_i - P_{i+d})^2}{\frac{1}{N-1} \sum_{i=1}^N (P_i - \bar{P})^2}, \quad d = 1, 2, \dots, nlag$                                                                                                                |

|                   |                                                                                                                                                                                                                                                                                                                                     |
|-------------------|-------------------------------------------------------------------------------------------------------------------------------------------------------------------------------------------------------------------------------------------------------------------------------------------------------------------------------------|
|                   | $d, P, P_i, P_{i+d}$ and $nlag$ same as above.                                                                                                                                                                                                                                                                                      |
| GetCTD            | $C(r) = \frac{N(r)}{N}, \quad r \in \{polar, neutral, hydrophobic\}$ <p><math>N(r)</math> is the number of amino acid.</p> <p><math>r</math> is the type and <math>N</math> is the length of the sequence.</p>                                                                                                                      |
| GetPAAC           | $H_1(i) = \frac{H_1^o(i) - \frac{1}{20} \sum_{i=1}^{20} H_1^o(i)}{\sqrt{\frac{\sum_{i=1}^{20} [H_1^o(i) - \frac{1}{20} \sum_{i=1}^{20} H_1^o(i)]^2}{20}}}$ <p><math>H_1^o(1), H_2^o(1)</math> and <math>M^o(i)</math> are original hydrophobicity values for <math>i = 1, 2, 3, 4 \dots 20</math> amino Acids.</p>                  |
| GetSOCN           | $\tau_d = \sum_{i=1}^{N-d} (d_{i,i+d})^2, \quad d = 1, 2, 3, \dots, nlag$ <p><math>d_i, i+d</math> distance between the two amino acids at position <math>i</math> and <math>i + d</math>.</p> <p><math>nlag</math> denotes the maximum value of the lag,</p> <p><math>N</math> is the length of a protein or peptide sequence.</p> |
| GetQSO            | $X_r = \frac{f_r}{\sum_{r=1}^{20} f_r + w \sum_{d=1}^{nlag} \tau_d}, \quad r = 1, 2, \dots, 20$ <p><math>f_r</math> is the normalized occurrence of amino acid, <math>r</math> is the type, <math>w</math> is weighting factor (<math>w = 0.1</math>), <math>nlag</math> and <math>\tau_d</math> same as described above.</p>       |
| GetTriad          | $d_i = \frac{f_i - \min\{f_1, f_2, \dots, f_{343}\}}{\max\{f_1, f_2, \dots, f_{343}\}}$ <p><math>f_i</math>, the value of the <math>i</math>-th dimension of number vectors correspond to the vector space of a sequence features and each feature.</p>                                                                             |
| Calculate AutoCor | Standardization of amino acid                                                                                                                                                                                                                                                                                                       |

$$P_r = \frac{P_r - \bar{P}}{\sigma}$$

Auto correlation

$$\bar{P} = \frac{\sum_{r=1}^{20} P_r}{20} \quad \text{and} \quad \sigma = \sqrt{\frac{1}{2} \sum_{r=1}^{20} (P_r - \bar{P})^2}$$

$P$  is the property and  $\bar{P}$  is the average of the property of the 20 amino acids
